# Supplementary material for: Peroxisome proliferator activated receptor alpha inhibits hepatocarcinogenesis through mediating NF-κB signaling pathway
Source: PubMed Central journal article supplement (PMC4226686; doi:10.18632/oncotarget.2212), 2014-07-13
Supplement: oncotarget-05-8330-s001.pdf [file oncotarget-05-8330-s001.pdf]

## Peroxisome Proliferator Activated Receptor Alpha Inhibits Hepatocarcinogenesis through Mediating NF- $\kappa$ B Signaling Pathway

Supplementary Material

**S Table 1: Enrichment of Kyoto Encyclopedia of Genes and Genomes (KEGG) Pathways in Differentially Expressed Genes in PPAR $\alpha$ <sup>-/-</sup> Tumor**

| Pathways                 | NG <sup>a</sup> | P <sup>b</sup> | Genes                                                                                                                                                                                    | Annotation                                        |
|--------------------------|-----------------|----------------|------------------------------------------------------------------------------------------------------------------------------------------------------------------------------------------|---------------------------------------------------|
| Pathways in cancer       | 32/321          | 4.2E-07        | Wnt9b,Hdac2,Ar,Bcl2,Fgfr2,Lama3,Igf1r,Lamc3,Nfkb1(p50),Wnt9a,Mecom,Tcf7,Fgf2,Fgf8,Cdkn1a,Mmp2,Cdkn2a,Egln3,Lama2,Rassf5,Bmp4,Mapk8,Ikbkg,Runx1t1,Ii6,Jun,Cdh1,Tcf7l2,Fgfr1,Mmp9,Dvl2,Bax | Cancer related pathway                            |
| MAPK signaling           | 24/263          | 1.0E-04        | Cacna1c,Fgfr2,Pak1,Cacnb1,Map2k6,Nfkb1(p50),Map3k3,Pla2g2c,Cacng6,Mecom,Fgf2,Fgf8,Cacng7,Nfatc2,Nfatc4,Bdnf,Cacna1e,Stk3,Cacna1b,Map3k8,Mapk8,Ikbkg,Jun,Fgfr1                            | Cell proliferation, differentiation and migration |
| NF- $\kappa$ B signaling | 14/102          | 1.1E-04        | Bcl2, Nfkb1(p50), Atm, Bcl2l1, Btk, Icam1, Ikbkg, Prkcb, Tnf, Tnfsf13b, Igh-VJ558, Malt1, Pias4, Ube2i                                                                                   | Immunity, inflammation and cell survival          |
| T cell receptor          | 14/108          | 1.7E-04        | Pak1,Ifng,Icos,Nfkb1(p50),Vav1,Ii4,Cd28,Nfatc2,Nfatc4,Cd8a,Map3                                                                                                                          | Cell proliferation, cytokine                      |

|                         |        |         |                                                                                                         |                                                             |
|-------------------------|--------|---------|---------------------------------------------------------------------------------------------------------|-------------------------------------------------------------|
| signaling               |        |         | k8,Ikbkg,Fyn,Jun                                                                                        | production and differentiation                              |
| Chemokine signaling     | 18/177 | 2.0E-04 | Gnai1,Pak1,Nfkb1(p50),Ccl7,Gng4,Vav1,Ccl3,Cxcl14,Pard3,Gng8,Ccl8,Elmo1,Prex1,Pf4,Ikbkg,Plcb1,Grk6,Gsk3a | Cellular activation, differentiation and survival           |
| Focal adhesion          | 19/199 | 2.0E-04 | Bcl2,Thbs4,Parvb,Lama3,Pak1,Igf1r,Lamc3,Tln2,Vav1,Pdpk1,Src,Ccl5a2,Itga7,Lama2,Mapk8,Fyn,Jun,Kdr,Thbs1  | Cell motility, proliferation, Differentiation, and survival |
| Adherens junction       | 10/72  | 9.2E-04 | Igf1r,Pvrl2,Tcf7,Src,Pard3,Fyn,Cdh1,Ctnnd1,Tcf7l2,Fgfr1                                                 | Cell movement and proliferation                             |
| Cell adhesion molecules | 14/143 | 1.3E-03 | Icosl,Icos,H2-T24,Cadm1,Selp,Pvrl2,Ncam2,Cd28,Cd8a,Cdh1,H2-Oa,Negr1,Ncam1,H2-M1                         | Cell-cell interactions                                      |
| Cell cycle              | 12/123 | 3.4E-03 | Hdac2,Chek2,Orc3,Stag2,Atm,Chek1,Atr,Cdkn1a,Cdkn2a,Cdc25a,Cdc23,Smc3                                    | Cell cycle                                                  |
| Wnt signaling           | 12/150 | 8.3E-03 | Wnt9b,Ppp2r1b,Wnt9a,Tcf7,Nfatc2,Nfatc4,Vangl2,Mapk8,Jun,Tcf7l2,Dvl2,Plcb1                               | Cell-fate specification, cell proliferation and division    |

<sup>a</sup>NG, number of annotated genes in the input list / number of annotated genes in the reference list.

<sup>b</sup>P value, corrected hypergeometric P values.
